# Supplementary material
Source: publisher figshare collection journal article supplement (https://acs.figshare.com/ndownloader/files/4136887)
Supplement: Supplementary file 1 [file 4136887]

## SUPPORTING INFORMATION

### Chemical Intercalation of Zero-Valent Metals into 2D Layered $\text{Bi}_2\text{Se}_3$ Nanoribbons

Kristie J. Koski<sup>1</sup>, Colin D. Wessells<sup>1</sup>, Bryan W. Reed<sup>2</sup>, Judy J. Cha<sup>1</sup>, Desheng Kong<sup>1</sup>, Yi Cui<sup>1,3</sup>

<sup>1</sup>Department of Materials Science & Engineering, Stanford University, Stanford, California 94305, USA

<sup>2</sup>Physical and Life Sciences Directorate, Lawrence Livermore National Laboratory, 7000 East Avenue, Livermore, California 94550, USA

<sup>3</sup>Stanford Institute for Materials and Energy Sciences, SLAC National Accelerator Laboratory, 2575 Sand Hill Road, Menlo Park, CA 94025, USA

#### Transmission Electron Microscopy

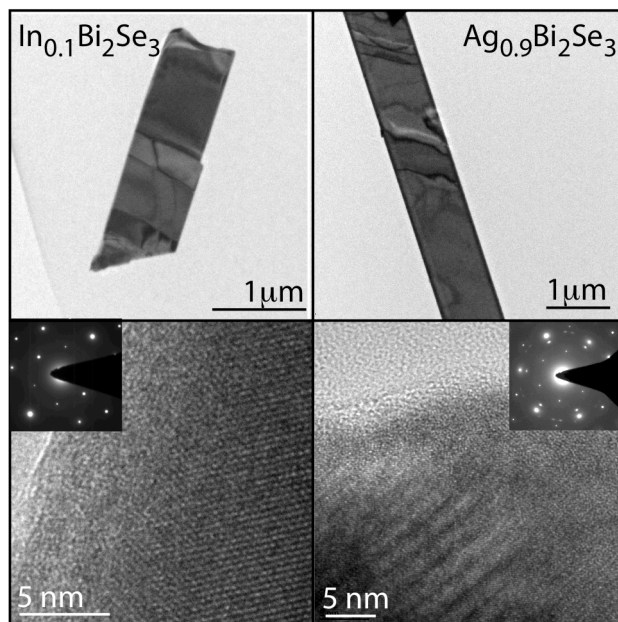

Figure 1S: Supplemental high-resolution TEM images of silver and indium-intercalated  $\text{Bi}_2\text{Se}_3$  nanoribbons further demonstrate that no secondary phases and no metal precipitates or particles are observed. Electron diffraction of intercalated nanoribbons shows no polycrystalline rings confirming no precipitates or adsorbates on the surface of the nanoribbons. Nanoribbon lengths and morphology are not destroyed nor altered with intercalation. A characteristic superlattice pattern and associated stripe phase of the charge density wave is observed in Ag-intercalated  $\text{Bi}_2\text{Se}_3$  nanoribbons.

## X-ray Photoelectron Spectroscopy: Characterization and Electron Transfer

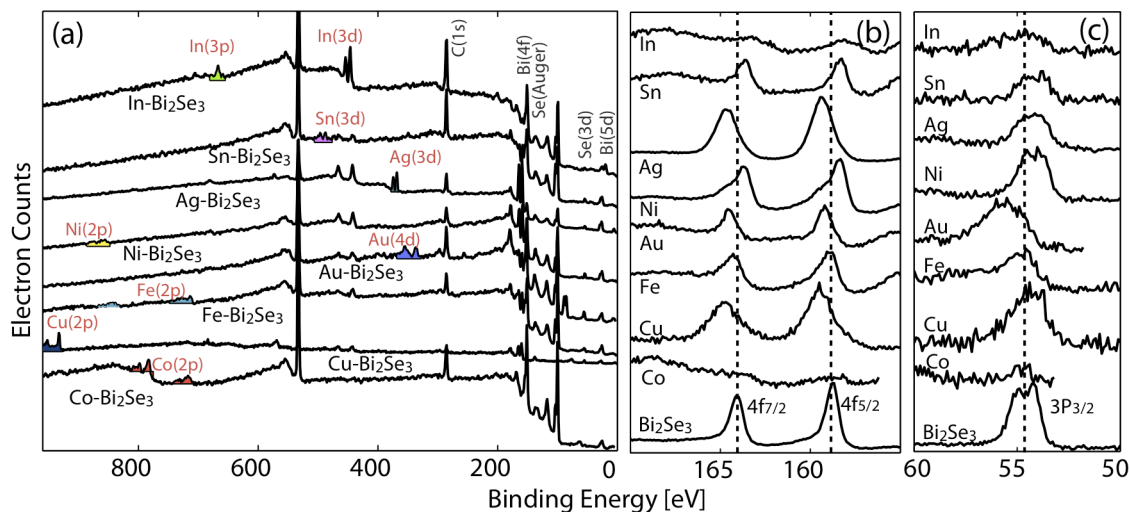

Figure 2S: (a) The atom % metal intercalated into  $\text{Bi}_2\text{Se}_3$  nanoribbons, as determined by EDX (see manuscript Fig. 2), is confirmed using X-ray photoelectron spectroscopy (XPS). Emissions of the intercalated metals are identified by color in the spectra. All spectra are normalized to the Bi (5d) peak. The atom % of intercalated Au (20%) is determined using only XPS since Bi and Se peaks overlap Au peaks in EDX (see manuscript text). (b) Bismuth 4f peaks and (c) Selenium 3p peaks are shown as possible indicators of charge transfer, or the lack thereof, between the intercalant guest and host  $\text{Bi}_2\text{Se}_3$ .

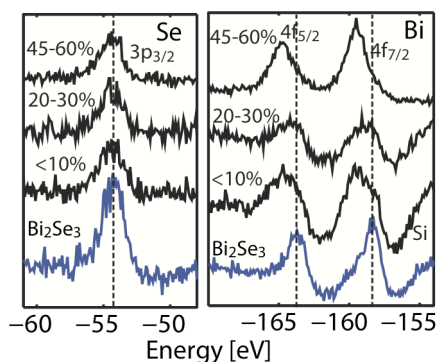

Figure 3S: A systematic study of the Bi and Se peaks detected by XPS on Cu-intercalated  $\text{Bi}_2\text{Se}_3$  as a function of Cu concentration demonstrates that the Se peak essentially does not shift with increasing copper concentration but the bismuth peak does. In terms of charge transfer from the guest to the host, this would seem to be a strong indication of no charge transfer to the Se but possible (though quite small) charge transfer to the host overall. No apparent chemical interaction between copper and selenium is observed based on these emission peaks.

## X-ray Diffraction

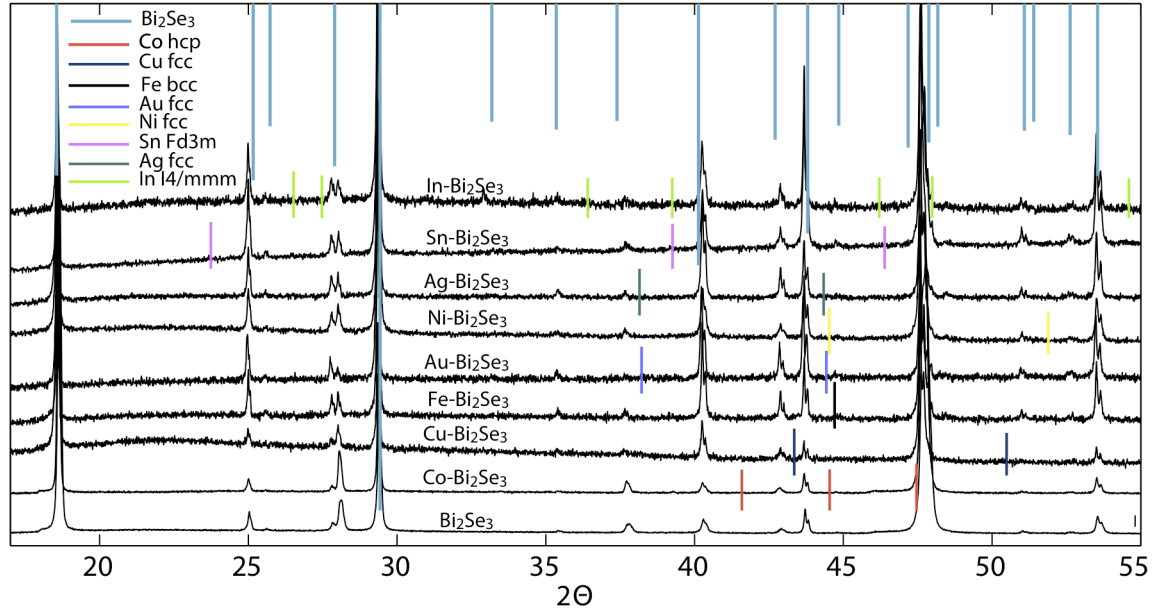

Figure 4S: Stacked plot of experimental XRD data shows no new structural phases as metal atoms are intercalated.  $\text{Bi}_2\text{Se}_3$  peak positions are identified on the top of the plot. No diffraction peaks are observed for any bulk metal intercalant (fcc, hcp, bcc, etcetera) confirming that no metal precipitates are on the nanoribbons. Intensities of diffraction peaks, however, may change with intercalation.

| Intercalant | Atom %    | a [Å]   | c [Å]   |
|-------------|-----------|---------|---------|
| None        | 0         | 4.1364  | 28.5330 |
| Copper      | 0.4-6.5%  | 4.1400  | 28.6190 |
| Copper      | 23%       | 4.1453  | 28.5782 |
| Cobalt      | 0.9-9.5%  | 4.1574  | 28.4930 |
| Gold        | 0-4.9%    | 4.1420  | 28.6440 |
| Indium      | 0.2-6.6%  | 4.1399  | 28.6124 |
| Iron        | 0.3-7.0%  | 4.1540  | 28.5670 |
| Nickel      | 0.2-1.3%  | 4.1387  | 28.6126 |
| Silver      | 0.7-18.3% | 4.1394  | 28.6231 |
| Tin         | 1.6-4.2%  | 4.13854 | 28.6153 |
| Tin         | 6%        | 4.1396  | 28.6155 |

Table 1: Lattice constants for all intercalated  $\text{Bi}_2\text{Se}_3$  nanoribbons and atomic percent intercalated for data presented in Figure 4 above and Fig. 5 in the manuscript determined through Rietveld refinement of XRD patterns. Rietveld refinement was performed using the program Maud<sup>1</sup>. Errors for the  $a$  and  $c$  lattice constants are  $\pm 0.0005$  Å and  $\pm 0.003$  Å respectively.

## Superlattice Intercalant Ordering With Heating

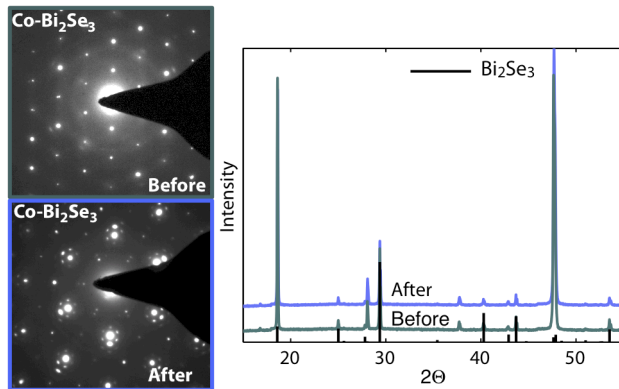

Figure 5S: Superlattice ordering is visible in copper and silver electron diffraction without heating. In cobalt, heating to 250°C for 5 minutes under nitrogen or vacuum induces intercalant ordering, giving rise to superlattice diffraction patterns. No obvious indicator of superlattice ordering is seen in bulk XRD (right) but ordering is observed in electron diffraction (left).

## References

- (1) Lutterotti, L. Matthies, S.; Wenk, H. -R. *Proceeding of the Twelfth International Conference on Textures of Materials (ICOTOM-12)*, **1999**, 1, 1599.
